# Supplementary material for: Electron cryotomography of ESCRT assemblies and dividing Sulfolobus cells suggests that spiraling filaments are involved in membrane scission
Source: PubMed Central journal article supplement — Mol Biol Cell. 2013 Aug 1;24(15):2319–27. doi: 10.1091/mbc.E12-11-0785 (PMC3727925; doi:10.1091/mbc.e12-11-0785), 2013-08-01
Supplement: supp_E12-11-0785v1_CombinedSupMats.pdf [file supp_E12-11-0785v1_CombinedSupMats.pdf]

# Supplemental Materials

*Molecular Biology of the Cell*

Dobro et al.

**Supplemental Figure. Sequence alignment of human ESCRT-III family proteins discussed in this study with the *Sulfolobus acidocaldarius* ESCRT-III ortholog Saci\_1373.** Note that residues 1-211 of Saci\_1373 were used in the alignment, removing the archaeal-specific winged helix-like domain of this protein (Samson et al., 2011). Sequence alignment was achieved with ClustalW (<http://www.ebi.ac.uk/Tools/msa/clustalw2/>) and shading performed with Boxshade ([http://www.ch.embnet.org/software/BOX\\_form.html](http://www.ch.embnet.org/software/BOX_form.html)). Residues identical in >50% of the sequences are outlined in black, and residues homologous in >50% of the sequences in gray. The table of pairwise comparisons gives percent sequence identity and homology for each pair. Values were generated using Needle ([http://www.ebi.ac.uk/Tools/psa/emboss\\_needle/](http://www.ebi.ac.uk/Tools/psa/emboss_needle/)) with default parameters. ND- it was not possible to generate a meaningful pairwise alignment of IST1 and Saci\_1373.

CHMP1B 1 -----MSNMEKHLFNLKFAAKELSRSAKKCDKKEEKAEKAKIKKAIQ  
 CHMP2a 1 ----MDLL-FGRRKT---PEELLRQNQRALNRAMRELDREERQKLETQEKKIADIKKMAK  
 CHMP3 1 ----MGLFGKTQEKP---PKELVNEWSLKIIRKEMRVVDRQIRDIQREEEKVKRSVKDAAK  
 Saci\_1373 1 MFDKLSIIFNSDRKRKVHLSKATTEISLKLKEQODRLDEAIRRLRERDKDLFEKVIIRSQI  
 IST1 1 -MHKLSVEAPPKILVERYLIEIAKNYNVPYEPDSVVMMAEAPPGVETDLIDVGFDDVKKG

CHMP1B 42 KGNMEVARTHAENAIROKNOAVNFLRMSARVDAVAARVOTAVTMGKVTKSMAGVVKSMDA  
 CHMP2a 53 QGQMDAVRIMAKDLVRTRRYVRKFVILMRANIQAVSLKIQTLSNNSMAQAMKGVTKAMGT  
 CHMP3 54 KGQKDVCIVLAKEMIRSRKAVSKLYASKAHMNSVLMGMKNQI AVLRLVAGSLQKSTEVKKA  
 Saci\_1373 61 EGDIA RATIYAQEI SDIRKMIKI IYTAYLAIEKVR LKLDTVQELQGVSLVLPV MRILGE  
 IST1 60 GPGRGGSGGFTAPVGGPDGTVPMPPMPMPMPMP SANTPFSYPLP-KGPSDFNGLPMGTYQA

CHMP1B 102 TLKTMN--LEKISALMDKFEHQFETLDVQTTQOMEDTMSSTTTLTTPQNQVDMLLQEMADE  
 CHMP2a 113 MNRQLK--LPQIQKIMMEFERQAEIMDMKEEMNDAIDDAMGDEEDEEESDAVVSQVLDE  
 CHMP3 114 MQSLVK--IPEIQATMRELSKEMMKAGIIEEMLEDTFESMDDQEMEEEAEMEIDRILFE  
 Saci\_1373 121 LKEQVRGIAPEVALALDSITSSVNSTAIETGALSEKTFVPTVADEQAKQIMEEAOKMAEV  
 IST1 119 FPNIHPPQIPATPPSYESVDDINADKNISSAQIVGPGPKPEASAKLPSRPADNYDNFVLP

CHMP1B 160 AGLDINMELP-----QGQTSVGTSVASAEQDELSQRLARLRDQV  
 CHMP2a 171 LGLSLTDELSNLPSTGGSLSVAAGGKKAEEAASALADADADLEERLKNLRD-  
 CHMP3 172 ITAGALGKAPS KVTDALPEPEPPGAMAASEDEEEEEEALEAMQSRLATLRS--  
 Saci\_1373 181 KVRELLPELP-----HPPSELPKRVAKQVQSSNKKS-----  
 IST1 179 ELPSVPDTLP-----TASAGASTSASEDIDFDDLSRRFEE LKKKT

|           | CHMP1B | CHMP2A | CHMP3 | Saci_1373 | IST1  |
|-----------|--------|--------|-------|-----------|-------|
| CHMP1B    |        | 26/45  | 21/49 | 15/39     | 15/26 |
| CHMP2A    |        |        | 27/52 | 18/36     | 14/24 |
| CHMP3     |        |        |       | 19/37     | 18/31 |
| Saci_1373 |        |        |       |           | ND    |
| IST1      |        |        |       |           |       |
